# Supplementary material for: Two site genetic incorporation of varying length polyethylene glycol into the backbone of one peptide
Source: Royal Society of Chemistry journal article supplement (doi:10.1039/c5cc04486c), 2015-01-01
Supplement: c5cc04486c1.pdf [file c5cc04486c1.pdf]

1  
2  
3  
4  
5  
6  
7  
8  
9  
10  
11  
12  
13  
14  
15  
16  
17  
18  
19  
20  
21

**Supporting Information**  
**For**  
**Genetic PEGylation of different lengths on one**  
**polypeptide backbone**

Qingmin Zang<sup>1,2#</sup>, Seiichi Tada<sup>1#</sup>, Takanori Uzawa<sup>1,3</sup>, Daisuke Kiga<sup>1,2</sup>, Masayuki Yamamura<sup>1,2</sup>, and Yoshihiro Ito<sup>1,2,3\*</sup>

<sup>1</sup>Nano Medical Engineering Laboratory, RIKEN, 2-1 Hirosawa, Wako, Saitama 351-0198, Japan

<sup>2</sup>Department of Computational Intelligence and Systems Science, Interdisciplinary Graduate School of Science and Engineering, Tokyo Institute of Technology, 4259 Nagatsuta-cho, Midori-ku, Yokohama, Kanagawa 226-8501, Japan

<sup>3</sup>Emergent Bioengineering Materials Research Team, RIKEN Center for Emergent Matter Science, 2-1 Hirosawa, Wako, Saitama 351-0198, Japan

# Equal contribution

\* E-mail: y-ito@riken.jp

22 **Contents**

23 **1. Materials and Methods**  
24 **1.1 Prepared DNA templates**  
25 **1.2 Primer sequence**  
26 **1.3 *In vitro* translation**  
27 **1.4 Mass spectra measurements**  
28 **2. Table S1**  
29 **3. Figure S1**  
30 **4. Figure S2**  
31 **5. Figure S3**  
32 **6. References**

33

34

35 **1. Materials and Methods**

36 **1.1 Prepared DNA templates**

37 The DNA templates for the cell-free translation encoding peptides were prepared.  
38 The plasmid DNA was prepared by pROX-FL92.1 as a template, and the primers  
39 are shown below. The PCR products were purified using the QIA-quick PCR  
40 Purification Kit (Qiagen) and used as the templates for cell-free translation reactions.

41

42 **1.2 Primer sequences**

43 Primer fp-(FL92-T7prom): 5'- CGCGAAATTAATACGAGTCAC-3'

44 Primer rp-(Prox)FLAG-TGA: 5'-

45 TCACTTGTCATCGTCATCCTTGTAGTCCTCATTAGACTAGTTTACTTCGATTT

46 G-3'

47 Primer rp(ProX)4bFLAG-TGA: 5'-

48 TCACTTGTCATCGTCATCCTTGTAGTCCCCGCTCATTAGACTAGTTTACTTCG

49 ATTTG-3'

50 Primer rp-(Prox)FLAG-CGGG:

51 5'-

52 TCACTTGTCATCGTCATCCTTGTAATCCTCATTAGACCCGGTTTACTTCGATT

53 TG-3'

54 Primer rp(Prox-4b)-amb-FLAG-TGA:

55 5'-

56 TCACTTGTCATCGTCATCCTTG TAGTCCTACTCATTAGACCCGGTTTACTTCG

57 ATTTG-3'

58

### 59 **1.3 *In vitro* translation**

60 The *in vitro* translation assays were performed using a RYTS kit (Proteins  
61 Express, Chiba, Japan) according to the manufacture's protocol. The translation reaction  
62 was performed in the presence of 200 pmol of each PEG-AF-tRNA, unless otherwise  
63 stated. The reaction mixture was incubated at 30 °C for 2 h.

64

### 65 **1.4 Mass spectra measurements**

66 The samples were prepared for mass spectrometry as previously reported.<sup>1</sup> The  
67 translated peptides were purified from 25- $\mu$ L reactions using prewashed Anti-DDDDK-  
68 tag mAb-MagneTci Agarose (MBL). After two washes with buffer (50 mM Tris-HCl,  
69 150 mM NaCl, pH 7.6), the peptides were eluted from the matrix with 0.2% TFA.  
70 Before freeze drying, 3xFlag Peptide (Sigma) (1 nmol or 10 fmol) was added to each  
71 sample as the internal standard. For the mass analysis, the peptides were desalted using  
72 ZipTip  $\mu$ -C18 (Millipore) and mixed with 2,5-dihydroxybenzoic acid or 3-hydroxy-2-  
73 pyridinecarboxylic acid as the matrix. The samples were subjected to MALDI-TOF-  
74 MS analysis on an Ultraflex spectrometer (Bruker Daltonics) in linear or reflector mode.  
75 Each sample was analyzed three times and the amount of each peptide was estimated by  
76 the area intensity comparing to 3xFlag peptide.

77

78 **2. Table S1:** MS data of PEGylation product. X and B indicate AF-PEG (4, 8, 12, 24)

| position      | sequence                                | M.W.Calc<br>ulated<br>[M+H] <sup>+</sup> | MW.<br>found |
|---------------|-----------------------------------------|------------------------------------------|--------------|
| PEG4-amber    | fMQKIEVN <b>X</b> SNEDYKDDDDK           | 2681.178                                 | 2681.437     |
|               | QKIEVN <b>X</b> SNEDYKDDDDK             | 2522.142                                 | 2522.389     |
|               | <b>X</b> SNEDYKDDDDK                    | 1723.719                                 | 1723.021     |
| PEG8-amber    | fMQKIEVN <b>B</b> SNEDYKDDDDK           | 2857.282                                 | 2857.416     |
|               | QKIEVN <b>B</b> SNEDYKDDDDK             | 2698.247                                 | 2698.390     |
|               | <b>B</b> SNEDYKDDDDK                    | 1899.824                                 | 1899.948     |
| PEG4-CGGG     | fMQKIEVN <b>X</b> SNEDYKDDDDK           | 2681.178                                 | 2861.451     |
|               | QKIEVN <b>X</b> SNEDYKDDDDK             | 2522.142                                 | 2522.428     |
|               | <b>X</b> SNEDYKDDDDK                    | 1723.719                                 | 1723.977     |
| PEG8-CGGG     | fMQKIEVN <b>B</b> SNEDYKDDDDK           | 2857.282                                 | 2857.623     |
|               | QKIEVN <b>B</b> SNEDYKDDDDK             | 2698.247                                 | 2698.562     |
|               | <b>B</b> SNEDYKDDDDK                    | 1899.824                                 | 1900.075     |
| PEG12-amber   | fMQKIEVN <b>X</b> SNEDYKDDDDK           | 3033.387                                 | 3033.970     |
|               | QKIEVN <b>X</b> SNEDYKDDDDK             | 2874.352                                 | 2874.890     |
|               | <b>X</b> SNEDYKDDDDK                    | 2075.928                                 | 2076.311     |
| PEG24-amber   | fMQKIEVN <b>X</b> SNEDYKDDDDK           | 3561.702                                 | 3562.222     |
|               | QKIEVN <b>X</b> SNEDYKDDDDK             | 3402.667                                 | 3403.168     |
|               | <b>X</b> SNEDYKDDDDK                    | 2604.243                                 | 2604.622     |
| PEG4(amber)-- | fMQKIEVN <b>X</b> SN <b>X</b> EDYKDDDDK | 3061.372                                 | n.d.         |
| PEG4(CGGG)    | QKIEVN <b>X</b> SN <b>X</b> EDYKDDDDK   | 2902.337                                 | 2903.113     |
| PEG4(CGGG)--  | fMQKIEVN <b>X</b> SN <b>X</b> EDYKDDDDK | 3061.372                                 | 3062.304     |
| PEG4(amber)   | QKIEVN <b>X</b> SN <b>X</b> EDYKDDDDK   | 2902.337                                 | 2903.271     |
| PEG4(amber)-- | fMQKIEVN <b>X</b> SN <b>B</b> EDYKDDDDK | 3237.477                                 | n.d.         |
| PEG8(CGGG)    | QKIEVN <b>X</b> SN <b>B</b> EDYKDDDDK   | 3078.442                                 | n.d.         |
| PEG8(amber)-- | fMQKIEVN <b>B</b> SN <b>X</b> EDYKDDDDK | 3237.477                                 | 3239.239     |
| PEG4(CGGG)    | QKIEVN <b>B</b> SN <b>X</b> EDYKDDDDK   | 3078.442                                 | 3079.390     |
| PEG4(CGGG)--  | fMQKIEVN <b>X</b> SN <b>B</b> EDYKDDDDK | 3237.477                                 | n.d.         |

|             |    |                       |          |          |
|-------------|----|-----------------------|----------|----------|
| PEG8(amber) |    | QKIEVNXSNEBDYKDDDDK   | 3078.442 | 3079.491 |
| PEG8(CGGG)  | -- | fMQKIEVNBsNEXDYKDDDDK | 3237.477 | 3239.195 |
| PEG4(amber) |    | QKIEVNBsNEXDYKDDDDK   | 3078.442 | 3080.503 |

79

80

81 **3. Figure S1**

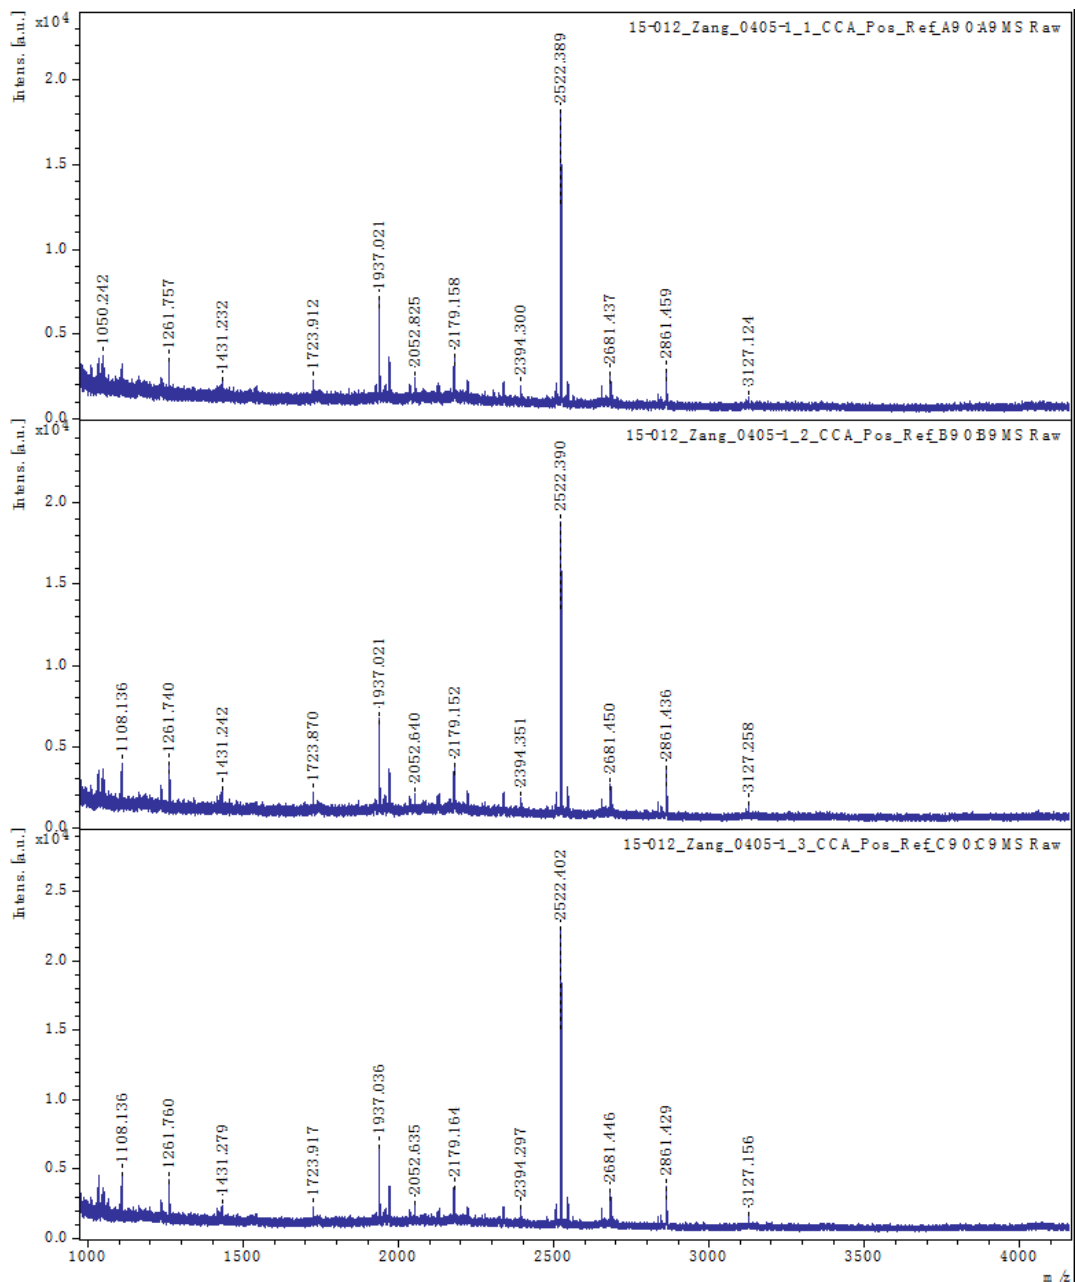

82

83 **4. Fig. S1. Mass spectra of the peptide containing PEG4 via the amber codon.**

84

85

86

### 5. Figure S2

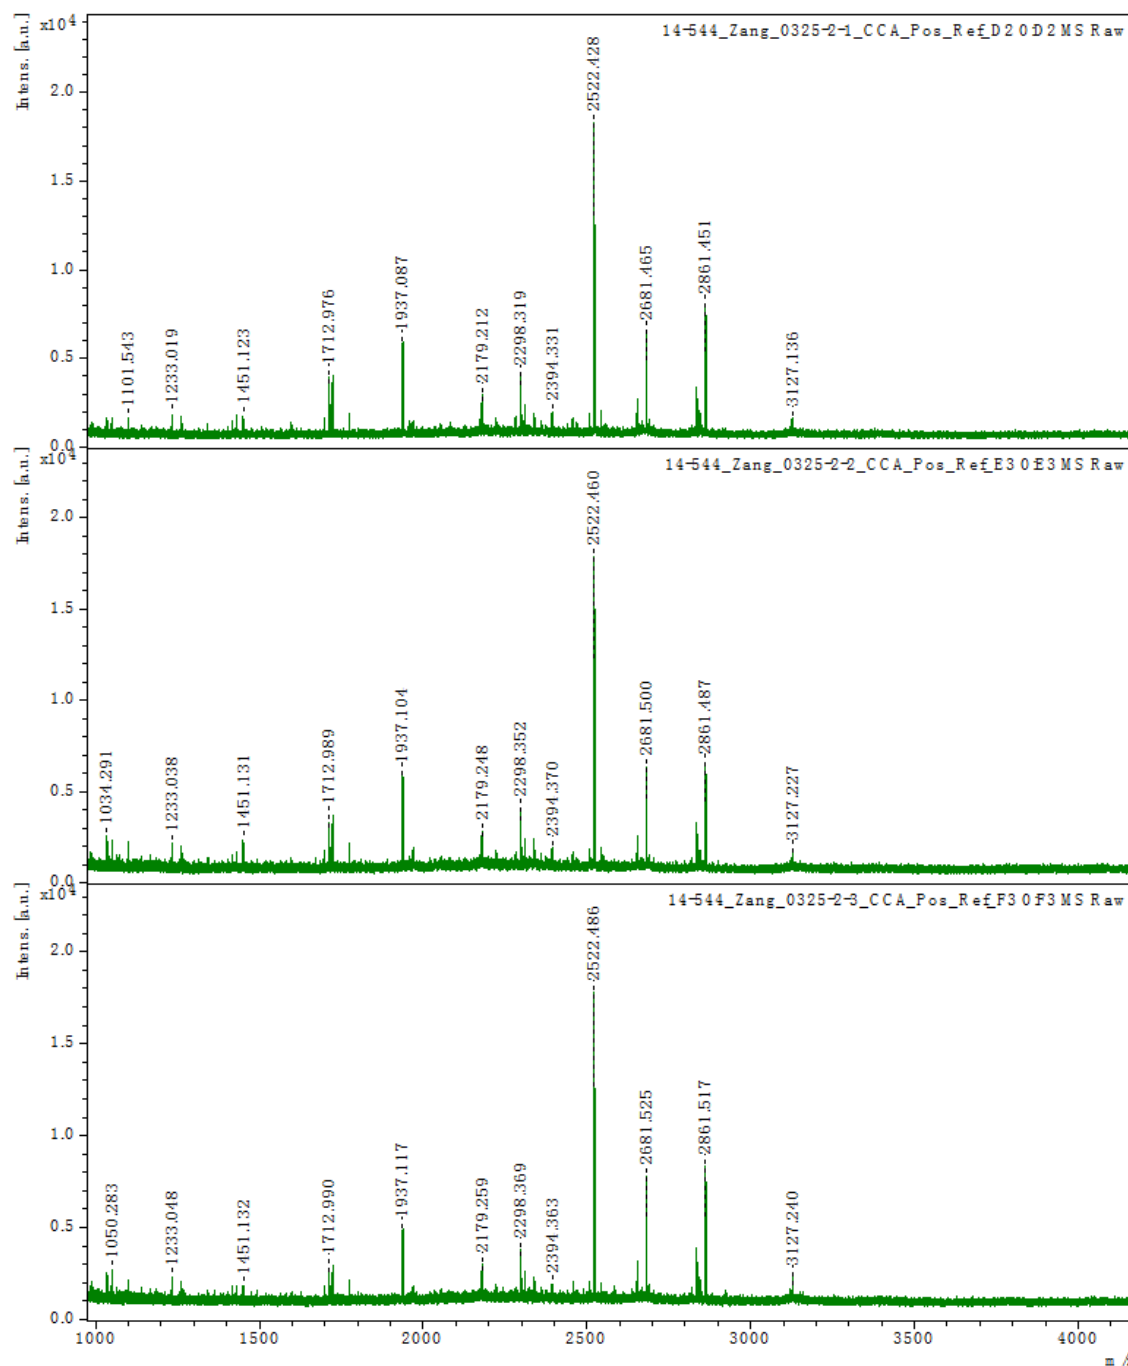

87

88

89

90

91

**Fig. S2.** Mass spectra of the peptide containing PEG4 via the frameshift codon.

92 **6. Figure S3**

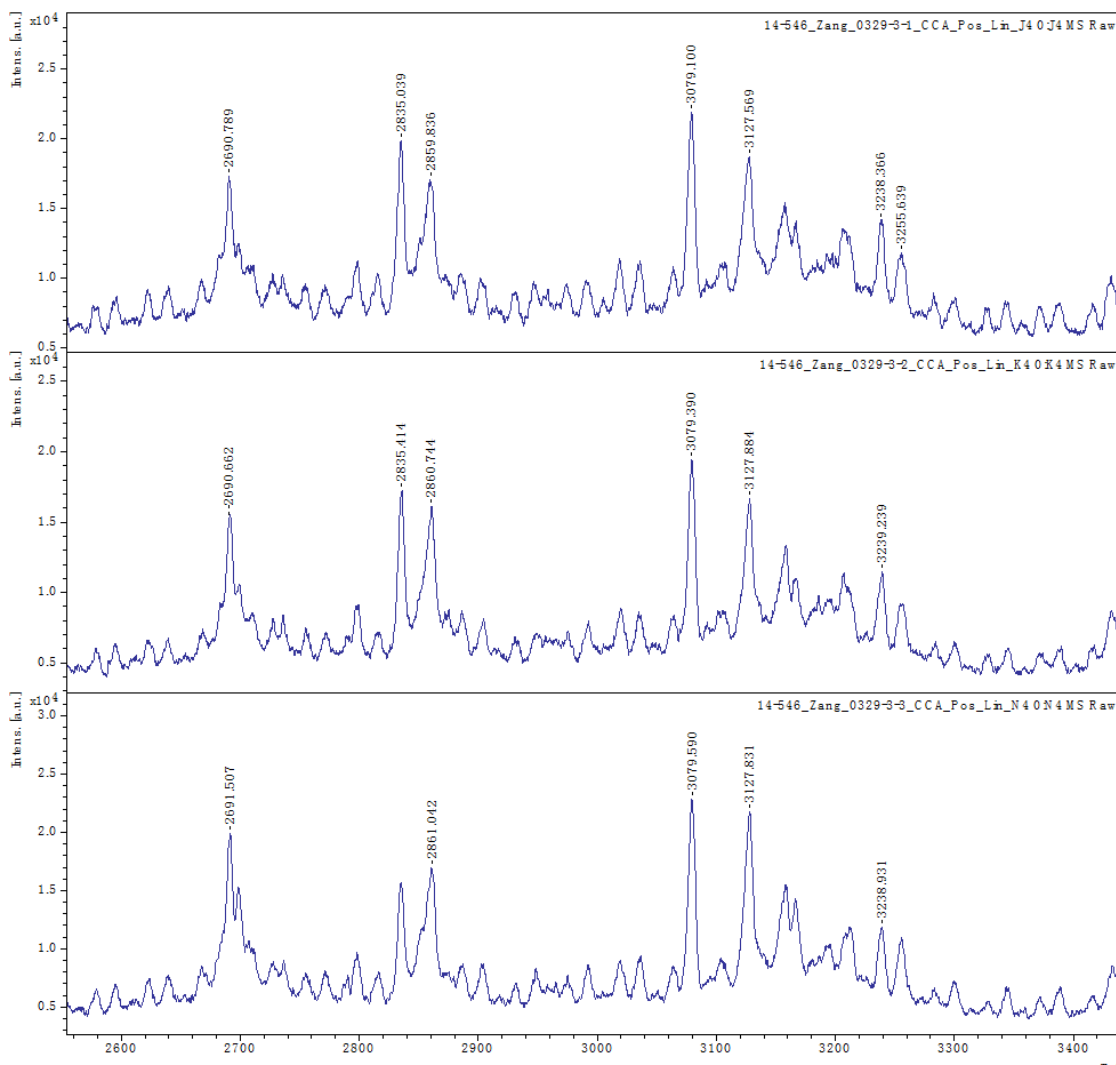

93

94

95 **Fig. S3.** The mass spectra of PEG8 (amber)—PEG4 (CGGG).

96

97 **7. References**

98 [1] K. Josephson, M. C. Hartman, J. W. Szostak, *J. Am. Chem. Soc.*, 2005, **127**,  
99 11727-11735.

100
